# Supplementary material
Source: PubMed Central journal article supplement (PMC3896262)
Supplement: NIHMS509558-supplement-1.pdf [file NIHMS509558-supplement-1.pdf]

## Supplemental Figure/Table Legends

**Figure S1: IL-15 protein cannot be detected on myeloid cells directly *ex vivo*.** IL-15 expression on individual granulocyte populations isolated directly *ex vivo* from the spleen and BM of WT and IL-15<sup>-/-</sup> mice. Data are representative of at least 4 independent experiments.

**Table S1: Phenotypes of myeloid and lymphoid populations.** Antibodies against the indicated surface markers were used to identify individual subsets of immune cells in **Figure 1**.

Figure S1

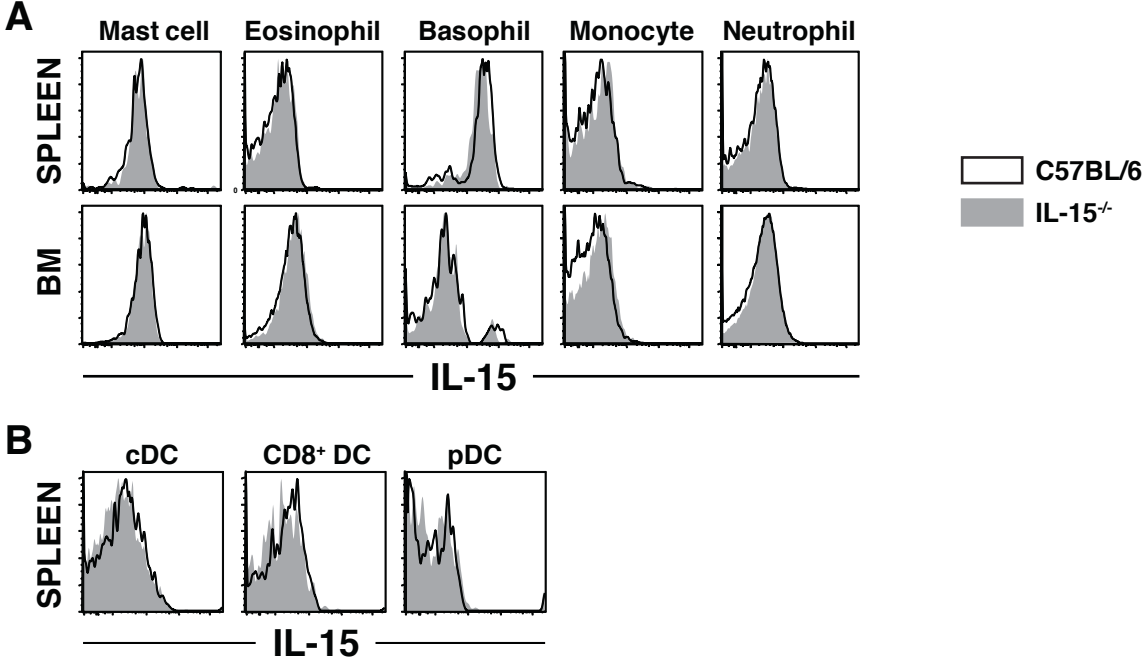

**Table S1**

| <b>Immune Subset</b>             | <b>Abbreviation in Fig. 1</b> | <b>Phenotypic definition</b>                                                                                                                                                            |
|----------------------------------|-------------------------------|-----------------------------------------------------------------------------------------------------------------------------------------------------------------------------------------|
| CD8 <sup>+</sup> dendritic cells | CD8 <sup>+</sup>              | CD3 <sup>-</sup> CD19 <sup>-</sup> NK1.1 <sup>-</sup> Ly6G <sup>-</sup> PDCA-1 <sup>-</sup> Ly6C <sup>-</sup> CD11c <sup>+</sup> MHCII <sup>+</sup> CD8 <sup>+</sup> CD11b <sup>-</sup> |
| CD8 <sup>-</sup> dendritic cells | CD8 <sup>-</sup>              | CD3 <sup>-</sup> CD19 <sup>-</sup> NK1.1 <sup>-</sup> Ly6G <sup>-</sup> PDCA-1 <sup>-</sup> Ly6C <sup>-</sup> CD11c <sup>+</sup> MHCII <sup>+</sup> CD8 <sup>-</sup> CD11b <sup>+</sup> |
| Monocytes                        | Mono                          | CD3 <sup>-</sup> CD19 <sup>-</sup> NK1.1 <sup>-</sup> Ly6G <sup>-</sup> PDCA-1 <sup>-</sup> CD11b <sup>+</sup> Ly6C <sup>+</sup>                                                        |
| Neutrophils                      | Neut                          | CD3 <sup>-</sup> CD19 <sup>-</sup> NK1.1 <sup>-</sup> CD11b <sup>+</sup> Ly6G <sup>+</sup>                                                                                              |
| Basophils                        | Baso                          | CD3 <sup>-</sup> CD19 <sup>-</sup> NK1.1 <sup>-</sup> CD49b <sup>+</sup> FcεRI <sup>+</sup> CD45 <sup>int</sup>                                                                         |
| Eosinophils                      | Eos                           | CD3 <sup>-</sup> CD19 <sup>-</sup> NK1.1 <sup>-</sup> SSC-A <sup>high</sup> Siglec F <sup>+</sup> CCR3 <sup>+</sup>                                                                     |
| Mast cells                       | MC                            | CD3 <sup>-</sup> CD19 <sup>-</sup> NK1.1 <sup>-</sup> CD117 <sup>+</sup> FcεRI <sup>+</sup>                                                                                             |
| NK cells                         | NK                            | B220 <sup>-</sup> CD3 <sup>-</sup> NK1.1 <sup>+</sup>                                                                                                                                   |
| NK T cells                       | NKT                           | B220 <sup>-</sup> CD3 <sup>+</sup> NK1.1 <sup>+</sup>                                                                                                                                   |
| CD8 <sup>+</sup> T cells         | CD8 <sup>+</sup>              | B220 <sup>-</sup> NK1.1 <sup>-</sup> CD3 <sup>+</sup> CD8 <sup>+</sup> CD4 <sup>-</sup>                                                                                                 |
| CD4 <sup>+</sup> T cells         | CD4 <sup>+</sup>              | B220 <sup>-</sup> NK1.1 <sup>-</sup> CD3 <sup>+</sup> CD4 <sup>+</sup> CD8 <sup>-</sup>                                                                                                 |
| Follicular B cells               | Fo                            | CD3 <sup>-</sup> CD4 <sup>-</sup> NK1.1 <sup>-</sup> B220 <sup>+</sup> AA4.1 <sup>-</sup> CD23 <sup>+</sup> IgM <sup>int</sup>                                                          |
| Marginal zone B cells            | MZ                            | CD3 <sup>-</sup> CD4 <sup>-</sup> NK1.1 <sup>-</sup> B220 <sup>+</sup> AA4.1 <sup>-</sup> IgM <sup>high</sup> CD23 <sup>-</sup>                                                         |
| Plasmacytoid dendritic cells     | pDC                           | CD3 <sup>-</sup> CD19 <sup>-</sup> NK1.1 <sup>-</sup> Ly6G <sup>-</sup> CD11c <sup>int</sup> PDCA-1 <sup>+</sup>                                                                        |

\*\* All subsets were gated on FSC and SSC, live, and negative for autofluorescence.
